# Supplementary material for: Harmine stimulates proliferation of human neural progenitors
Source: PeerJ journal article supplement (doi:10.7717/peerj.2727), 2016-12-06
Supplement: Dakicetal_2016_SupplementaryInformation.pdf [file Dakicetal_2016_SupplementaryInformation.pdf]

## Title: Harmine stimulates proliferation of human neural cells

Authors: Vanja Dakic<sup>1,2</sup>, Renata de Moraes Maciel<sup>1</sup>, Hannah Drummond<sup>1,2</sup>, Juliana M. Nascimento<sup>1,3</sup>, Pablo Trindade<sup>1</sup>, \*Stevens K. Rehen<sup>1,2</sup>

<sup>1</sup>D'Or Institute for Research and Education (IDOR), Rio de Janeiro, RJ, Brazil

<sup>2</sup>Institute of Biomedical Sciences, Federal University of Rio de Janeiro, Rio de Janeiro, RJ, Brazil

<sup>3</sup>Department of Biochemistry and Tissue Biology, Institute of Biology, State University of Campinas, Campinas, SP, Brazil

### Supplementary information

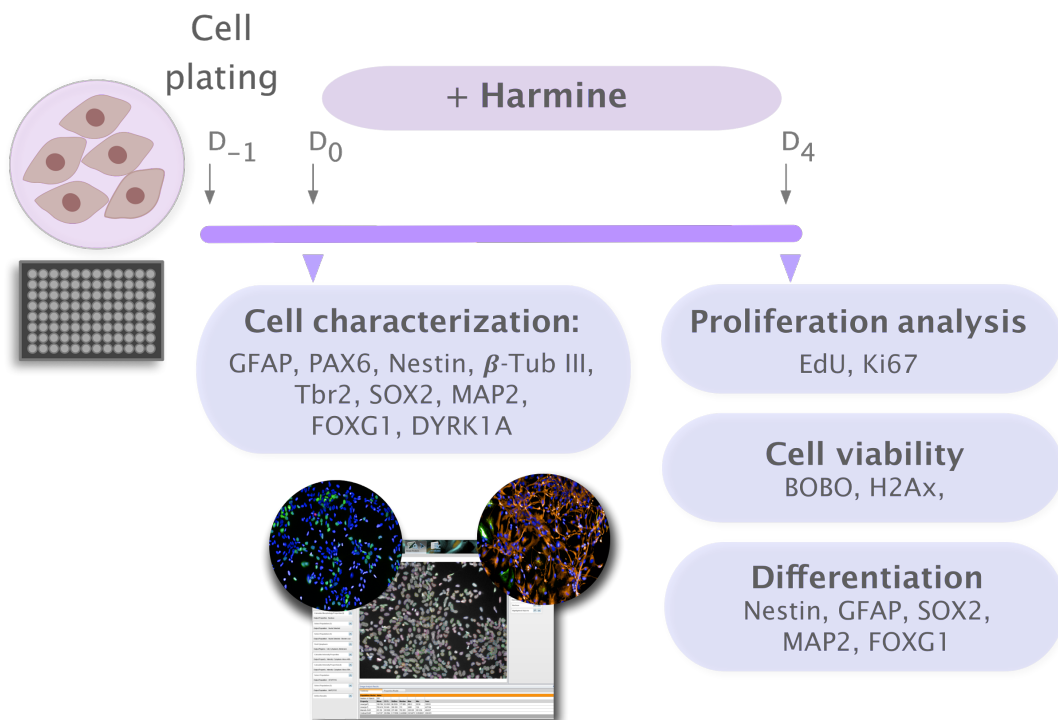

**Supplementary figure 1:** Scheme for characterization and proliferation experiments.

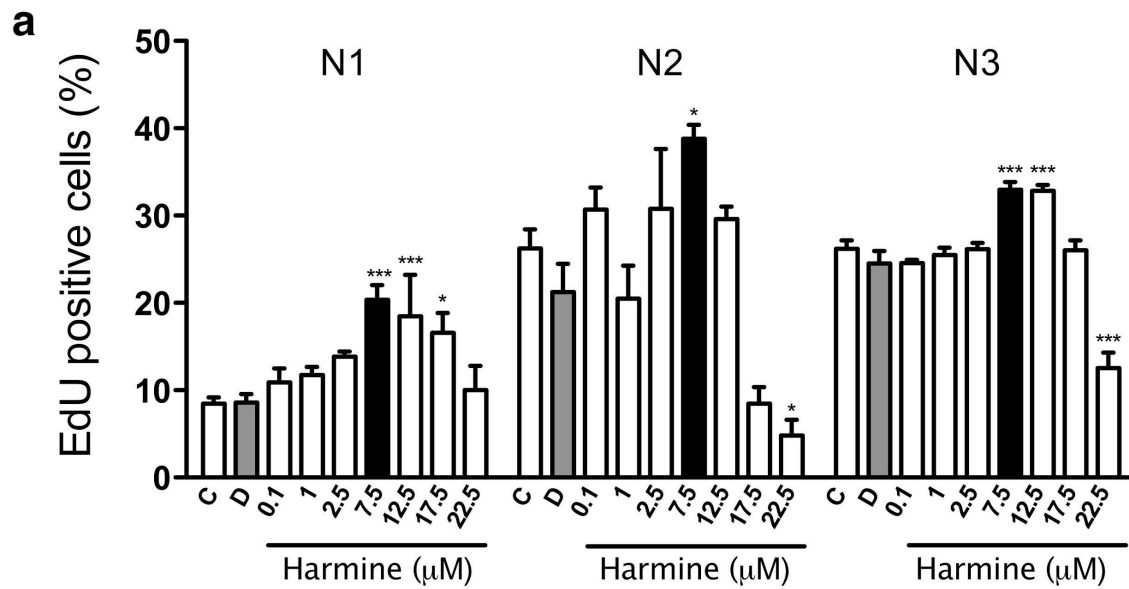

**b**

|           | Control DMSO | Harmine (7.5μM) | p               |
|-----------|--------------|-----------------|-----------------|
| <b>N1</b> | 8.60±0.94    | 20.35±1.69      | 0.0001 to 0.001 |
| <b>N2</b> | 21.24±3.25   | 38.79±1.61      | 0.01 to 0.05    |
| <b>N3</b> | 24.54±1.4    | 32.97±0.88      | 0.0001 to 0.001 |

**Supplementary figure 2: Effect of harmine on cell proliferation.** (a) Dose-response curve of harmine in 3 different lines of hNPC. (b) Table showing mean ± sem and p-value. A minimum of 10,000 hNPCs was counted per condition/per experiment. Data were analyzed by one-way ANOVA with Tukey's multiple comparison test. C - control and D - Control DMSO.

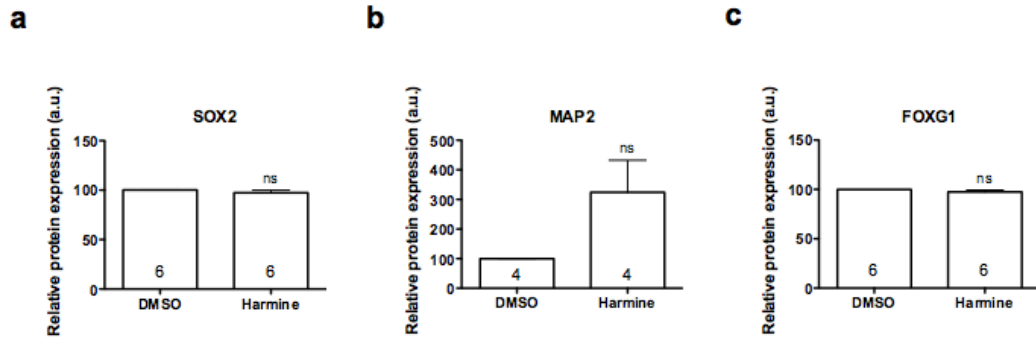

**Supplementary figure 3: Quantification of differentiation markers with or without harmine exposure.** (a) Expression of SOX2 protein relative to DMSO control. (b) Expression of MAP2 protein relative to DMSO control. (c) Expression of FOXG1 protein relative to DMSO control. A minimum of 10,000 hNPCs was counted per condition/per experiment. Data were analyzed by one-way ANOVA with Tukey's multiple comparison test, ns =  $p > 0.1$ . Values represent mean  $\pm$  sem. The number inside the bar represents the number of experiments in each group.
