# Supplementary material for: Harmine stimulates proliferation of human neural progenitors
Source: PeerJ. 2016 Dec 6;4:e2727. doi: 10.7717/peerj.2727 (PMC5144684; doi:10.7717/peerj.2727)
Supplement: Data S1 [file peerj-04-2727-s002.xlsx]

## Sheet: Fig 2
EdU
	Control						DMSO						Harmine
N1	87.0172	82.1312	91.3216	104.7	127.385		75.8492	86.3192	105.281	139.6	92.9502		185.202	237.087	244.067	280.479
N2	134.322	152.872	129.614	104.944	96.4218		62.194	77.307	102.684	151.789	106.026		209.934	166.714	185.169	180.697	170.574
N3	115.382	103.521	92.8432	108.29	113.507		98.0192	89.4604	94.0251	96.389	122.106		128.913	126.997	146.397	131.195	138.368
N4	160.914	121.058	106.009				182.518	66.079	51.403				186.988	192.799	159.424	86.3422	186.243
N5	116.105	80.0837	144.195	83.2782	76.4485		95.1752	118.418	109.385	88.6759	88.3454		196.629	193.765	193.765	219.321
N6	92.8739	113.764	108.127	94.8635	83.5594		91.7887	97.3654	111.413	116.899	82.5345		106.258	99.6865	122.807	131.278	100.892
GFAP/Nestine
	Control						DMSO						Harmine
N1	103.092	103.299	89.3467	106.832	105.695		96.6647	104.463	109.754	102.52	86.5988		133.263	131.984	124.282	118.85	129.034
N2	96.6653	110.202	113.282	95.9952	99.2977		99.4967	110.08	77.2458	105.956	107.221		166.721	188.236	178.227	211.691	179.655
N3	112.524	129.564	118.736	123.831	90.3688		86.9904	81.7489	99.0527	105.119	127.089		114.667	111.734	98.2231	100.983	97.3813
N4	54.7063	166.142	129.627	131.12	169.11		105.758	100.939	115.892	80.9324	96.4786		274.546	168.249	169.759	168.806	191.266
N5	77.9068	127.541	64.4216	88.8807	129.608		128.808	84.6577	131.934	89.4523	65.1476		164.856	240.281	312.723	191.077
N6	80.8823	123.078	92.235	82.4426	114.417		110.554	128.906	130.022	62.5339	67.9849		117.185	134.119	241.674	132.169	113.056

## Sheet: Fig 3
BOBO-3
	Control									DMSO									Harmine									H2O2
N1	150.249	165.893	162.823	73.1867	145.121					139.608	135.47	136.39	81.342	60.3068	86.7261	82.9898	77.1673		277.601	172.179	186.225	100.213	70.9653	131.242	105.353	39.1016		1953.75	1895.42	2110.26	2193.42
N2	51.8772	40.0742	205.667							52.935	221.538	97.6894	172.826	34.6833	20.3284				75.3381	372.228	56.5114	120.265	76.9739	205.718	76.5445	203.527		1717.42	1567.84	1770.54	1776.07
N3	45.997	30.0304	41.4751	63.3758	28.2738	80.5693	51.9309	141.088		105.598	171.951	45.6347	59.3681	117.448					131.756	180.147	63.9657	71.6255	109.835	63.9657	71.6255	109.835		2148.9	2173.28	2084.56	2223.64
H2AX
	Control						DMSO						Harmine						H2O2
N1	84.1888	77.8193	88.6371	115.877	117.081		64.6333	60.5009	121.688	115.148	138.03		65.8465	94.0054	77.4207	91.8937	95.9724		257.959	258.263	226.082	166.311
N2	118.719	121.03	156.943	163.475	217.497		80.3367	94.736	85.8186	133.516	105.593		93.1496	84.0122	69.3386	99.6554			714.886	308.77	533.853	274.115
N3	152.041	142.827	160.87	136.749	106.952		81.5177	142.185	87.4428	95.3793	93.4756		90.6668	78.4054	92.4957	91.3515	53.9114		236.554	143.074	306.535	152.393

## Sheet: Fig 4
EdU
	Control											DMSO						Harmine						INDY						Pargyline						INDY+Pargyline
N1	93.401	80.1582	90.3429	85.7415	87.7616	91.0162	75.08	89.6414	42.0852	86.6955		105.802	106.363	102.379	91.8299	93.6255		121.402	105.942	115.874	87.0883	130.492		132.512	127.715	116.913	125.358	93.9061		90.3709	100.528	82.515	96.6556	87.1724
N2	52.8227	94.2902	81.096	84.5899	91.8996	77.9698	92.2214	88.3597	71.0739	99.1173		81.142	93.6466	109.369	109.461	106.381		186.696	156.997	159.388	140.355	172.03		161.502	136.585	164.95	160.721	163.387		93.5086	78.1997	77.0964	92.2674	98.4737
N3	79.7116	102.575	80.6385	106.334	88.208	96.4985	124.253	105.252	92.3275	121.988		90.0618	99.0216	96.035	122.657	92.2245		174.717	146.241	151.39	151.596	145.52		128.476	125.129	140.422	125.592	169.619		129.506	95.7261	116.22	124.871	102.884
N4	88.7505	99.6337	91.0449	91.9367	118.611	102.351	97.9062	106.203	103.72			106.687	104.111	96.8616	110.159	82.181		132.452	144.15	145.603	124.259	131.244		148.264	144.831	149.678	135.074	137.069		103.986	121.113	90.0575	102.799	91.7458		137.974	135.501	134.064	132.951	119.307
N5	178.885	82.516	86.7828	71.1829	81.7717	102.511	99.6802	87.3209	147.029			114.938	95.8988	98.4765	95.2169	95.4701		142.804	129.819	152.051	130.347	109.376		130.156	117.673	115.179	137.188	144.439		98.8572	112.524	113.278	107.363	125.096		143.951	145.336	134.769	114.535	113.46
Ki-67
	Control											DMSO						Harmine						INDY						Pargyline						INDY+Pargyline
N1	87.659	97.8506	96.3445	103.246	95.4526	102.354	85.4657	95.9936	80.8598			103.1	109.987	98.3038	96.0667	92.5428		115.689	106.858	113.803	98.0845	108.583		112.005	117.927	107.764	121.217	123.746		94.8677	97.2949	95.3502	97.0317	92.5428		109.914	109.139	120.646	112.619	128.981
N2	61.0324	108.841	73.4437	92.0165	70.9544	94.9119	83.7718	96.5714	70.3718	93.323		93.1641	98.5135	108.541	97.2423	102.539		129.709	114.968	132.993	121.8	113.591		124.766	133.205	129.692	121.906	122.912		111.313	114.209	99.6963	113.273	120.405		120.423	125.278	129.692	128.438	139.578
N3	86.098	101.612	91.9889	101.321	108.49	116.811	109.837	133.51	112.444			98.7025	111.571	93.1997	102.789	93.7375		132.369	120.403	123.975	122.518	135.579		135.848	136.772	135.675	125.3	117.763		102.001	119.903	96.7782	108.871	109.561		114.083	121.936	117.805	115.006	129.472
N4	104.022	92.284	93.2302	72.6539	78.0765	96.8652	92.6414	88.6942	86.6183	111.25		110.405	98.6191	91.2963	98.9627	100.717		120.836	106.268	112.31	105.638	95.5502		115.456	119.068	122.069	125.771	122.642		101.528	92.409	101.863	99.2139	117.464		119.709	122.097	119.238	123.031	111.7

## Sheet: Supplementary Fig 2
EdU
	Control						DMSO						0.1 μM						1 μM						2.5 μM						7.5 μM						12.5 μM						17.5 μM						22.5 μM
N1	7.48	7.06	7.85	9	10.95		6.52	7.42	9.05	12	7.99		6.37	10.96	10.92	16.44	9.77		14.93	10.85	11.08	12.41	9.55		13.59	15.93	12.5	12.99	14.21		15.92	20.38	20.98		24.11		25.85	21.08	25.09	0.15	20.26		10	16.86	19.11		20.26		6.88
N2	28.53	32.47	27.53	22.29	20.48		13.21	16.42	21.81	32.24	22.52		21.9	33.33	37.08	32.05	29.06		14.61	13.39	26.32	27.68	91.61		18.63	21.4	31.91	25.32	56.68		44.59	35.41	39.33	38.38	36.23		29.64	29.98	31.72	24.24	32.44		8.28	10.45	5.75	14.46	3.33		3.23
N3	28.31	25.4	22.78	26.57	27.85		24.05	21.95	23.07	23.65	29.96		25.12	24.61	24.29	23.37	25.5		24.85	25.63	23.16	28.34	25.45		25.66	25.54	27.85	24.17	27.62		31.63	31.16	35.92	32.19	33.95		30.83	32.72	34.08	32.21	34.4		24.59	27.19	23.39	29.84	25.17		12.86
[truncated: 4 more columns]

## Sheet: Supplementary Fig 3
SOX2
	Control						DMSO						Harmine
N1	99.5293	94.7305	102.908	97.6538	102.921		101.107	101.621	98.9923	98.0565	100.223		96.8761	85.335	97.2468	89.0211	98.4142
N2	96.8192	98.9034	102.186	99.1607	98.9734		97.4772	99.0323	98.714	101.858	102.919		96.022	96.755	100.108	101.281	100.051
N3	77.8803	94.1399	88.4715	84.0753	80.9353		99.7782	102.06	100.624	102.815	94.7232		99.8988	100.44	95.0011	93.8317	91.4859
N4	87.1019	88.3774	100.982	111.314	98.1053		112.839	125.579	128.285	41.6001	91.6966		111.137	103.379	119.01	109.563	100.914
N5	103.087	99.4505	99.7244	100.384	100.156		101.821	100.145	97.403	99.8418	100.789		99.0745	99.381	99.1662	92.5289	92.6036
N6	96.3939	95.4558	105.077	100.969	96.3056		101.94	96.5014	100.84	98.8608	101.857		77.2411	91.402	98.552	89.0735	95.7859
MAP2
	Control						DMSO						Harmine
N1	0	109.232	417.566	101.621	252.376		125.327	117.55	133.233	0	123.89		347.643	0	1170.25	0	477.631
N2	0	315.693	176.948	866.871	1008.07		167.799	216.894	0	115.307	0		400.798	232.225	491.014	659.825	0
N3	139.54	177.365	114.159	101.053	202.933		106.25	48.421	56.7748	0	288.554		0	82.2728	0	0	0
N4	0	1313.88	567.822	0	0		0	0	0	500	0		0	0	1230.97	761.313	622.861
FOXG1
	Control						DMSO						Harmine
N1	100.063	99.9946	99.9431	100.063	100.063		100.001	100.063	100.063	99.8722	100		96.3693	95.3518	97.1907	91.2943	94.5521
N2	100.061	99.8537	99.9886	99.8696	100.052		100.156	100.04	99.8432	100.021	99.9398		100.11	99.8514	98.9771	100.037	99.9676
N3	101.474	101.474	100.66	101.474	100.673		100.01	100.236	99.0847	100.701	99.9687		99.2186	97.7529	100.774	100.843	99.8046
N4	97.7928	102.021	104.289	103.982	89.8979		100.604	101.52	100.916	99.9703	96.99		101.897	101.727	101.685	100.872	103.164
N5	99.6585	100.024	100.402	100.076	100.308		99.0635	100.402	100.259	100.204	100.071		44.2951	98.9679	100.402	99.954	99.1876
N6	100.254	99.7505	100.298	100.042	100.299		100.106	100.245	100.291	100.171	99.1864		100.174	100.005	99.5782	100.142	98.9039
